# Supplementary material for: Secular trends in consultations for asthma in early childhood, the 16 administrative regions of Morocco, 2004–2012
Source: Springer Nature journal article supplement (doi:10.1186/s12889-015-2262-8), 2015-09-17
Supplement: MOESM1 [file 9750358]

**Additional File 1 : Direct method for age-adjusted prevalence rate of consultations for asthma in under-5 children, urban areas, Morocco : 9-year trends (2004-2012)**

| Age group (month) | 2004                | 2005              | 2006                | 2007              | 2008               | 2009             | 2010              | 2011                | 2012                |
|-------------------|---------------------|-------------------|---------------------|-------------------|--------------------|------------------|-------------------|---------------------|---------------------|
| <b>Region 1</b>   |                     |                   |                     |                   |                    |                  |                   |                     |                     |
| AdjR (95% CI)     | 0                   | *                 | 2.56(1.56-3.57)     | 3.43(2.31-4.55)   | 4.39(3.18-5.61)    | *                | *                 | 5.48 (4.29-6.66)    | 11.91 (10.10-13.71) |
| 0-11              | 0 (0 – 3.77)        | 0 (0-2.59)        | 1.30 (0.16-4.70)    | 0 (0-2.22)        | 0 (0-2.07)         | 0 (0-1.92)       | 0 (0-1.65)        | 2.08 (0.68-4.86)    | 0.91 (0.11-3.30)    |
| 12-23             | 0 (0 – 3.83)        | 1.41 (0.17-5.10)  | 5.23 (2.26-10.31)   | 3.63 (1.33-7.91)  | 0.56 (0.01-3.15)   | 0 (0-1.93)       | 4.95 (2.47-8.85)  | 18.00 (13.03-24.24) | 29.89 (23.06-38.09) |
| 24-59             | 0 (0 – 1.32)        | 0.66 (0.14-1.94)  | 2.47 (1.26-3.70)    | 4.16 (2.81-5.94)  | 6.26 (4.63-8.27)   | 1.91 (1.09-3.10) | 0 (0-0.39)        | 3.42 (2.37-4.77)    | 10.34 (8.41-12.58)  |
| <b>Region 2</b>   |                     |                   |                     |                   |                    |                  |                   |                     |                     |
| AdjR (95% CI)     | 2.06 (1.49-2.63)    | 5.70 (4.80-6.59)  | 1.96 (1.44-2.48)    | 4.77 (3.97-5.57)  | 4.83 (4.04-5.61)   | 1.38 (0.97-1.86) | 4.94 (4.15-5.74)  | 2.05 (1.54-2.55)    | 1.80 (1.32-2.27)    |
| 0-11              | 6.70 (4.62-9.37)    | 3.79 (2.32-5.83)  | 3.27 (1.94-5.18)    | 0.70 (0.19-1.79)  | 3.55 (2.20-5.43)   | 0.81 (0.26-1.90) | 4.78 (3.20-6.87)  | 2.27 (0.55-2.50)    | 0.83 (0.27-1.94)    |
| 12-23             | 0,21 (0.01-1.15)    | 8.00 (5.76-10.81) | 1.10 (0.40-2.39)    | 6.32 (4.42-8.74)  | 5.44 (3.72-7.67)   | 1.15 (0.46-2.36) | 5.80 (4.04-8.07)  | 2.23 (1.22-3.75)    | 1.50 (0.69-2.86)    |
| 24-59             | 1,15 (0.66-1.87)    | 5.58 (4.51-6.82)  | 1.81 (1.22-2.58)    | 5.60 (4.54-6.82)  | 5.04 (4.06-6.18)   | 1.64 (1.12-2.33) | 4.72 (3.76-5.84)  | 2.24 (1.61-3.04)    | 2.21 (1.58-2.99)    |
| <b>Region 3</b>   |                     |                   |                     |                   |                    |                  |                   |                     |                     |
| AdjR (95% CI)     | 3.00 (2.41-3.58)    | 1.74 (1.26-2.22)  | 3.40(2.76-4.04)     | 1.88 (1.41-2.35)  | *                  | *                | *                 | 0.83(0.52-1.15)     | *                   |
| 0-11              | 3,13 (1.91- 4.83)   | 0.84 (0.27-1.97)  | 1.80 (0.90-3.23)    | 1.27 (0.55-2.51)  | 0.16 (0.004- 0.87) | 0.30 (0.04-1.10) | 1.11 (0.45-2.29)  | 0 (0-0.57)          | 0.32 (0.04-1.16)    |
| 12-23             | 4,26 (2.78-6.25)    | 2.04 (1.05-3.56)  | 5.12 (3.48-7.27)    | 2.73 (1.59-4.37)  | 0.79 (0.26-1.84)   | 0 (0-0.57)       | 0.16 (0.004-0.90) | 0 (0-0.58)          | 0.65 (0.18-1.65)    |
| 24-59             | 2,57 (1.94-3.33)    | 1.93 (1.33-2.71)  | 3.36 (2.60-4.29)    | 1.81 (1.26-2.50)  | 0.77 (0.44-1.25)   | 0.09 (0.01-0.34) | 0.25 (0.08-0.59)  | 1.35 (0.89-1.96)    | 0.87 (0.52-1.38)    |
| <b>Region 4</b>   |                     |                   |                     |                   |                    |                  |                   |                     |                     |
| AdjR (95% CI)     | 0.65 (0.52-0.79)    | 0.78 (0.63-0.94)  | 0.84 (0.69-1.00)    | 1.17 (0.99-1.35)  | 1.78 (1.56-2.00)   | 1.45 (1.26-1.65) | 0.88 (0.73-1.04)  | 1.65 (1.44-1.85)    | 0.84 (0.70-0.98)    |
| 0-11              | 0,51 (0.27-0.88)    | 0.75 (0.46-1.19)  | 0.20 (0.07-0.47)    | 1.29 (0.89-1.81)  | 2.28 (1.74-2.93)   | 1.70 (1.26-1.65) | 0.35 (0.16-0.66)  | 1.46 (1.04-2.00)    | 1.74 (1.28-2.33)    |
| 12-23             | 0,38 (0.17-0.72)    | 0.92 (0.58-1.40)  | 0.24 (0.09-0.53)    | 1.42 (0.99-1.96)  | 2.92 (2.30-3.75)   | 2.50 (1.94-3.17) | 1.56 (1.12-2.13)  | 2.66 (2.07-3.35)    | 0.77 (0.58-1.00)    |
| 24-59             | 0,77 (0.60-0.99)    | 0.75 (0.57-0.97)  | 1.20 (0.98-1.46)    | 1.06 (0.85-1.30)  | 1.30 (1.08-1.56)   | 1.08 (0.88-1.31) | 0.84 (0.66-1.06)  | 1.41 (1.18-1.97)    | 0.60 (0.45-0.77)    |
| <b>Region 5</b>   |                     |                   |                     |                   |                    |                  |                   |                     |                     |
| AdjR (95% CI)     | 1.37 (1.11-1.63)    | 0.62 (0.45-0.80)  | 1.37(1.10-1.63)     | 1.80 (1.50-2.10)  | 0.91 (0.70-1.12)   | 1.96 (1.65-2.27) | 2.13 (1.80-2.46)  | 1.55 (1.26-1.85)    | 2.85 (2.48-3.22)    |
| 0-11              | 2,66 (1.93-3.53)    | 1.10 (0.63-1.78)  | 3.15 (2.31-4.19)    | 0.98 (0.55-1.62)  | 0.65 (0.31-1.19)   | 3.71 (1.13-2.49) | 1.64 (1.06-2.42)  | 1.61 (1.02-2.42)    | 4.01 (3.04-5.19)    |
| 12-23             | 1,27 (0.78-1.96)    | 0.41 (0.15-0.90)  | 1.41 (0.87-2.16)    | 1.18 (0.70-1.87)  | 1.56 (1.00-2.32)   | 3.64 (2.75-4.71) | 1.71 (1.12-2.51)  | 1.55 (0.97-2.34)    | 2.62 (2.11-3.22)    |
| 24-59             | 0,99 (0.71-1.33)    | 0.54 (0.35-0.80)  | 0.78 (0.54-1.08)    | 2.26 (1.85-2.74)  | 0.79 (0.56-1.09)   | 1.51 (1.18-1.90) | 2.42 (1.98-2.92)  | 1.54 (1.18-1.97)    | 2.55 (2.10-3.07)    |
| <b>Region 6</b>   |                     |                   |                     |                   |                    |                  |                   |                     |                     |
| AdjR (95% CI)     | 2.25 (1.90-2.61)    | 3.42 (3.00-3.85)  | 1.09(1.28-1.75)     | 2.31 (1.96-2.66)  | 2.36 (2.00-2.71)   | 2.18 (1.84-2.51) | 4.87 (4.35-5.39)  | 4.03 (3.55-4.50)    | 2.92 (2.57-3.27)    |
| 0-11              | 1.03 (0.58-1.70)    | 1.99 (1.31-2.90)  | 1.01 (0.55-1.70)    | 2.05 (1.37-2.94)  | 1.68 (1.07-2.49)   | 2.75 (1.96-3.74) | 4.81 (3.72-6.12)  | 2.67 (1.88-3.67)    | 4.08 (3.11-5.27)    |
| 12-23             | 5.42 (4.26-6.79)    | 6.45 (5.17-7.96)  | 1.67 (1.06-2.50)    | 3.84 (2.88-5.00)  | 5.33 (4.20-6.68)   | 4.21 (3.22-5.41) | 9.31 (7.76-11.08) | 6.88 (5.57-8.41)    | 3.31 (2.72-4.00)    |
| 24-59             | 1.64 (1.27-2.10)    | 2.92 (2.43-3.48)  | 0.93 (0.66-1.26)    | 1.91 (1.52-2.36°) | 1.63 (1.28-2.03)   | 1.36 (1.04-1.75) | 3.48 (2.94-4.10)  | 3.56 (3.00-4.18)    | 2.43 (2.02-2.90)    |
| <b>Region 7</b>   |                     |                   |                     |                   |                    |                  |                   |                     |                     |
| AdjR (95% CI)     | 0.69 (0.54-0.84)    | 0.94 (0.76-1.11)  | 7.59 (7.09-8.09)    | 1.35 (1.14-1.55)  | 1.05 (0.87-1.23)   | 2.10 (1.84-2.35) | 1.24 (1.04-1.44)  | 0.89 (0.73-1.06)    | 1.70 (1.47-1.93)    |
| 0_11              | 0.65 (0.38-1.04)    | 0.31 (0.13-0.75)  | 3.99 (3.21-4.89)    | 1.62 (1.15-2.23)  | 0.76 (0.44-1.20)   | 1.36 (0.93-1.91) | 1.44 (1.00-2.02)  | 0.58 (0.32-0.97)    | 1.03 (0.66-1.53)    |
| 12-23             | 1.14 (0.75-1.64)    | 1.45 (0.99-2.04)  | 12.55 (11.13-14.09) | 1.50 (1.05-2.09)  | 2.03 (0.49-2.69)   | 2.77 (2.15-3.52) | 1.88 (1.36-2.52)  | 1.04 (0.67-1.54)    | 1.72 (1.23-2.34)    |
| 24-59             | 0.57 (0.40-0.78)    | 0.97 (0.76-1.23)  | 7.17 (6.57-7.82)    | 1.21 (0.98-1.49)  | 0.84 (0.64-1.07)   | 2.12 (1.18-2.47) | 0.93 (0.77-1.24)  | 0.94 (0.74-1.20)    | 1.91 (1.61-2.25)    |
| <b>Region 8</b>   |                     |                   |                     |                   |                    |                  |                   |                     |                     |
| AdjR (95% CI)     | 6.75 (6.28-7.23)    | 1.35(1.14-1.57)   | 1.52 (1.28-1.75)    | 1.91 (1.64-2.17)  | 0.93 (0.75-1.11)   | 2.01 (1.74-2.27) | 2.77 (2.45-3.09)  | 3.01(2.69-3.32)     | 4.22 (3.83-4.62)    |
| 0-11              | 7.91 (6.81-9.11)    | 1.50 (1.03-2.11)  | 1.25 (0.83-1.80)    | 1.61 (1.14-2.22)  | 1.03 (0.66-1.54)   | 2.12 (1.57-2.79) | 2.56 (1.94-3.32)  | 3.85 (3.09-4.75)    | 4.76 (3.89-5.76)    |
| 12-23             | 13.87 (12.38-15.49) | 1.73 (1.23-2.39)  | 1.61 (1.13-2.23)    | 3.16 (2.47-3.97)  | 1.47 (1.02-2.06)   | 3.02 (2.36-3.81) | 3.34 (2.62-4.19)  | 3.92 (3.14-4.83)    | 6.60 (5.57-7.77)    |
| 24-59             | 3.76 (3.30-4.26)    | 1.16 (0.92-1.44)  | 1.58 (1.27-1.93)    | 1.56 (1.26-1.91)  | 0.70 (0.51-0.94)   | 1.60 (1.30-1.95) | 2.64 (2.24-3.10)  | 2.37 (2.03-2.75)    | 3.17 (2.74-3.65)    |

AdjR = Age-adjusted prevalence rate of consultations for asthma, expressed per 1000 childhood population ; 95%CI= confidence interval at 95%.

\* Directly standardized rates method is unreliable with small number (number of total observed events should be >= 25)

**Additional File 1 : Continued**

| Age group        | 2004             | 2005              | 2006                | 2007                | 2008                | 2009                | 2010                | 2011                | 2012                |
|------------------|------------------|-------------------|---------------------|---------------------|---------------------|---------------------|---------------------|---------------------|---------------------|
| <i>Region 9</i>  |                  |                   |                     |                     |                     |                     |                     |                     |                     |
| AdjR (95% CI)    | 4.35 (4.09-4.60) | 2.44 (2.25-2.62)  | 5.74 (5.45-6.03)    | 5.58 (5.30-5.86)    | 10.50 (10.13-10.87) | 7.75 (7.43-8.07)    | 8.70 (8.35-9.06)    | 7.43 (7.10-7.76)    | 8.38 (8.03-8.74)    |
| 0-11             | 4.50 (3.96-5.09) | 1.68 (1.36-2.05)  | 3.94 (3.44-4.48)    | 5.67 (5.08-6.32)    | 11.37 (10.53-12.27) | 5.78 (5.19-6.43)    | 5.83 (4.22-6.49)    | 5.60 (5.00-6.25)    | 7.00 (6.32-7.74)    |
| 12-23            | 5.86 (5.24-6.54) | 2.97 (2.54-3.47)  | 8.63 (7.89-9.43)    | 6.12 (5.50-6.79)    | 17.80 (16.73-18.91) | 11.92 (11.06-12.83) | 11.12 (10.26-12.03) | 10.29 (9.47-11.16)  | 11.52 (10.64-12.46) |
| 24-59            | 3.52 (3.24-3.81) | 2.55 (2.32-2.80)  | 5.20 (4.86-5.56)    | 5.26 (4.93-5.62)    | 7.79 (7.39-8.22)    | 7.03 (6.64-7.42)    | 8.94 (8.48-9.42)    | 6.92 (6.52-7.35)    | 7.51 (7.10-7.94)    |
| <i>Region 10</i> |                  |                   |                     |                     |                     |                     |                     |                     |                     |
| AdjR (95% CI)    | 6.82 (6.43-7.20) | 7.36 (6.97-7.74)  | 12.85 (12.32-13.38) | 12.93 (12.40-13.45) | 12.04 (11.54-12.54) | 13.91 (13.37-14.44) | 16.34 (15.76-16.93) | 17.19 (16.60-17.79) | 20.91 (20.26-21.57) |
| 0-11             | 4.50 (3.84-5.25) | 6.48 (5.65-7.39)  | 8.96 (7.99-10.01)   | 9.72 (8.73-10.80)   | 10.81 (9.77-11.94)  | 11.86 (10.78-13.03) | 15.02 (13.81-16.30) | 17.76 (16.44-19.15) | 18.33 (17.00-19.73) |
| 12-23            | 8.92 (7.96-9.97) | 9.51 (8.50-10.61) | 20.01 (18.55-21.55) | 17.34 (16.00-18.76) | 17.25 (15.92-18.66) | 18.63 (17.27-20.08) | 19.09 (17.71-20.53) | 22.65 (21.16-24.22) | 28.71 (27.04-30.47) |
| 24-59            | 6.88 (6.40-7.39) | 6.95 (6.50-7.42)  | 11.81 (11.17-12.48) | 12.55 (11.89-13.23) | 10.77 (10.17-11.39) | 13.05 (12.39-13.73) | 15.89 (15.15-16.66) | 15.26 (14.54-16.01) | 19.24 (18.43-20.08) |
| <i>Region 11</i> |                  |                   |                     |                     |                     |                     |                     |                     |                     |
| AdjR (95% CI)    | 1.74 (1.44-2.04) | 3.48 (3.06-3.89)  | 2.88 (2.47-3.29)    | 0.92 (0.69-1.15)    | 0.98 (0.74-1.21)    | 1.13 (0.88-1.38)    | 1.62 (1.31-1.92)    | 1.13 (0.87-1.38)    | 1.10 (0.85-1.35)    |
| 0-11             | 1.64 (1.08-2.39) | 1.60 (1.01-2.40)  | 0.41 (0.15-0.90)    | 0.54 (0.23-1.06)    | 0.20 (0.04-0.59)    | 0.47 (0.19-0.96)    | 1.03 (0.58-1.70)    | 2.03 (1.37-2.89)    | 0.48 (0.19-0.99)    |
| 12-23            | 1.80 (1.19-2.60) | 1.54 (0.96-2.33)  | 2.96 (2.14-3.99)    | 1.09 (0.62-1.76)    | 0.54 (0.23-1.06)    | 1.20 (0.71-1.90)    | 3.24 (2.38-4.31)    | 1.36 (0.83-2.10)    | 1.45 (0.90-2.22)    |
| 24-59            | 1.76 (1.38-2.20) | 4.93 (4.31-5.62)  | 3.79 (3.19-4.47)    | 1.00 (0.71-1.37)    | 1.44 (1.09-1.87)    | 1.36 (1.02-1.78)    | 1.22 (0.89-1.64)    | 0.69 (0.45-1.02)    | 1.20 (0.88-1.60)    |
| <i>Region 12</i> |                  |                   |                     |                     |                     |                     |                     |                     |                     |
| AdjR (95% CI)    | 0.41 (0.24-0.58) | 0.67 (0.46-0.89)  | 1.89 (1.51-2.27)    | 1.82 (1.45-2.19)    | 2.00 (1.62-2.38)    | 1.29 (0.98-1.59)    | 1.54 (1.19-1.89)    | 1.78 (1.40-2.15)    | 4.72 (4.12-5.32)    |
| 0-11             | 0.41 (0.13-0.96) | 0.48 (0.15-1.11)  | 1.50 (0.86-2.44)    | 1.38 (0.77-2.28)    | 1.19 (0.63-2.03)    | 0.90 (0.43-0.66)    | 0.85 (0.39-1.62)    | 0.65 (0.26-1.35)    | 3.96 (2.84-5.37)    |
| 12-23            | 0.44 (0.14-1.02) | 0.48 (0.16-1.12)  | 2.17 (1.37-3.25)    | 1.95 (1.20-2.97)    | 1.75 (1.05-2.73)    | 1.45 (0.83-2.40)    | 1.24 (0.66-2.12)    | 1.97 (1.22-3.02)    | 5.24 (3.93-6.83)    |
| 24-59            | 0.39 (0.20-0.69) | 0.81 (0.53-1.18)  | 1.93 (1.46-2.50)    | 1.93 (1.47-2.50)    | 2.38 (1.86-2.99)    | 1.36 (0.98-1.84)    | 1.89 (1.42-2.47)    | 2.10 (1.60-2.71)    | 4.81(4.05-5.68)     |
| <i>Region 13</i> |                  |                   |                     |                     |                     |                     |                     |                     |                     |
| AdjR (95% CI)    | 0.44 (0.32-0.55) | 2.69 (2.38-3.00)  | 0.96 (0.77-1.14)    | 1.81 (1.56-2.06)    | 0.61 (0.47-0.75)    | 0.36 (0.25-0.47)    | 0.50 (0.37-0.63)    | 0.88 (0.70-1.05)    | 1.32 (1.11-1.53)    |
| 0-11             | 0.74 (0.43-1.19) | 1.82 (1.29-2.50)  | 1.08 (0.68-1.62)    | 1.97 (1.43-2.65)    | 0.41 (0.19-0.77)    | 0.89 (0.54-1.37)    | 0.37 (0.16-0.73)    | 0.54 (0.28-0.95)    | 0.93 (4.05-5.68)    |
| 12-23            | 0.56 (0.29-0.98) | 3.95 (3.14-4.90)  | 1.37 (0.91-1.96)    | 2.12 (1.55-2.83)    | 1.00 (0.63-1.52)    | 0.22 (0.07-0.52)    | 1.22 (0.80-1.79)    | 1.46 (1.00-2.06)    | 2.52 (0.57-1.44)    |
| 24-59            | 0.30 (0.20-0.44) | 2.57 (2.21-2.97)  | 0.79 (0.59-1.03)    | 1.66 (1.37-1.99)    | 0.55 (0.39-0.75)    | 0.24 (0.14-0.38)    | 0.32 (0.20-0.49)    | 0.80 (0.60-1.05)    | 1.07 (1.90-3.30)    |
| <i>Region 14</i> |                  |                   |                     |                     |                     |                     |                     |                     |                     |
| AdjR (95% CI)    | 1.21 (1.02-1.41) | 2.13 (1.85-2.41)  | 2.77 (2.46-3.09)    | 2.36 (2.07-2.65)    | 4.03 (3.66-4.40)    | 4.54 (4.15-4.93)    | 5.29 (4.85-5.72)    | 6.56 (6.08-7.04)    | 8.72 (8.17-9.28)    |
| 0-11             | 0.91 (0.56-1.41) | 3.74 (2.94-4.68)  | 4.81 (3.92-5.85)    | 4.19 (3.37-5.16)    | 6.38 (5.36-7.54)    | 7.97 (6.68-9.25)    | 9.12 (7.87-10.58)   | 13.62 (12.09-15.28) | 14.62 (13.04-16.35) |
| 12-23            | 2.17 (1.60-2.89) | 3.20 (2.47-4.08)  | 4.20 (3.36-5.18)    | 3.31 (2.58-4.18)    | 6.58 (5.54-7.76)    | 7.07 (6.00-8.28)    | 9.18 (7.93-10.58)   | 9.41 (8.15-10.81)   | 14.89 (13.29-16.64) |
| 24-59            | 1.01 (0.81-1.25) | 1.29 (1.03-1.60)  | 1.69 (1.39-2.04)    | 1.49 (1.22-1.82)    | 2.50 (2.14-2.90)    | 2.68 (2.31-3.09)    | 2.88 (2.47-3.33)    | 3.47 (3.03-3.96)    | 4.96 (4.45-5.52)    |
| <i>Region 15</i> |                  |                   |                     |                     |                     |                     |                     |                     |                     |
| AdjR (95% CI)    | 5.47 (4.79-6.14) | 2.76(2.28-3.24)   | 0.91 (0.62-1.19)    | 4.16 (3.56-4.77)    | 2.58 (2.11-3.05)    | 4.02 (3.44-4.61)    | 3.53 (2.94-4.13)    | 7.11 (6.26-7.95)    | 3.40 (2.81-3.99)    |
| 0-11             | 0.32 (0.07-0.94) | 1.99 (1.16-3.19)  | 0.69 (0.25-1.51)    | 7.96 (6.20-10.08)   | 2.29 (1.40-3.54)    | 7.69 (7.97-9.75)    | 6.70 (5.01-8.79)    | 3.70 (2.48-5.32)    | 3.64 (2.40-5.29)    |
| 12-23            | 1.71 (0.96-2.82) | 3.42 (2.29-4.91)  | 0.93 (0.40-1.83)    | 4.90 (3.53-6.62)    | 1.27 (0.64-2.28)    | 4.46 (3.17-6.09)    | 3.00 (1.90-4.49)    | 9.94 (7.84-12.42)   | 6.80 (5.05-8.96)    |
| 24-59            | 8.31 (7.28-9.45) | 2.80 (2.23-3.48)  | 0.97 (0.63-1.43)    | 2.71 (2.12-3.41)    | 3.09 (2.46-3.82)    | 2.71 (2.12-3.40)    | 2.69 (2.06-3.45)    | 7.30 (6.23-8.50)    | 2.25 (1.68-2.95)    |
| <i>Region 16</i> |                  |                   |                     |                     |                     |                     |                     |                     |                     |
| AdjR (95% CI)    | 1.48 (1.29-1.68) | 1.63 (1.41-1.84)  | 1.91 (1.68-2.14)    | 2.81 (2.53-3.10)    | 2.45 (2.19-2.70)    | 2.53 (2.27-2.78)    | 2.15 (1.91-2.40)    | 4.33(3.99-4.66)     | 4.72 (4.38-5.06)    |
| 0-11             | 1.01 (0.69-1.43) | 2.89 (2.28-3.60)  | 2.14 (1.63-2.76)    | 3.14 (2.52-3.86)    | 2.30 (1.78-2.92)    | 2.46 (1.93-3.10)    | 2.09 (1.60-2.69)    | 2.92 (2.35-3.59)    | 1.64 (1.23-2.16)    |
| 12-23            | 1.95 (1.48-2.52) | 1.62 (1.17-2.17)  | 2.12 (1.61-2.73)    | 4.27 (3.55-5.10)    | 4.21 (3.50-5.03)    | 4.14 (3.43-4.94)    | 3.36 (2.72-4.11)    | 7.87 (6.92-8.92)    | 6.77 (5.89-7.74)    |
| 24-59            | 1.49 (1.28-1.76) | 1.20 (0.98-1.45)  | 1.76 (1.48-2.07)    | 2.20 (1.87-2.57)    | 1.89 (1.61-2.21)    | 2.00 (1.71-2.32)    | 1.76 (1.80-2.08)    | 3.60 (3.20-4.02)    | 3.17 (4.63-5.56)    |
