# Supplementary material for: Secular trends in consultations for asthma in early childhood, the 16 administrative regions of Morocco, 2004–2012
Source: Springer Nature journal article supplement (doi:10.1186/s12889-015-2262-8), 2015-09-17
Supplement: MOESM2 [file 9750358]

**Additional File 2 : Direct method for age-adjusted prevalence rate of consultations for asthma in under-5 children, rural areas, Morocco : 9-year trends (2004-2012)**

| Age group (months) | 2004                | 2005               | 2006             | 2007              | 2008                | 2009             | 2010                | 2011               | 2012                |
|--------------------|---------------------|--------------------|------------------|-------------------|---------------------|------------------|---------------------|--------------------|---------------------|
| <b>Region 1</b>    |                     |                    |                  |                   |                     |                  |                     |                    |                     |
| AdjR (95% CI)      | 0                   | 0                  | 0                | 0                 | 0                   | 0                | 0                   | 0                  | 0                   |
| 0-11               | 0 (0-4.46)          | 0 (0-3.14)         | 0 (0--2.68)      | 0 (0-2.29)        | 0 (0-1.98)          | 0 (0-1.70)       | 0 (0-1.73)          | 0 (0-1.43)         | 0 (0-1.85)          |
| 12-23              | 0 (0-4.93))         | 0 (0-3.19)         | 0 (0-2.72)       | 0 (0-0.32)        | 0 (0-2.01)          | 0 (0-1.72)       | 0(0-1.76)           | 0 (0-1.45)         | 0 (0-1.88)          |
| 24-59              | 0 (0-2.00)          | 0 (0-0.95)         | 0 (0-1.88)       | 0 (0-1.60)        | 0 (0-1.33)          | 0 (0-1.17)       | 0 (0-1.30)          | 0 (0-1.11)         | 0 (0-1.60)          |
| <b>Region 2</b>    |                     |                    |                  |                   |                     |                  |                     |                    |                     |
| AdjR (95% CI)      | 0                   | *                  | *                | 0                 | 0                   | 0                | *                   | 0                  | *                   |
| 0-11               | 0 (0-19.21)         | 0 (0-7.75)         | 0 (0-7.53)       | 0 (0-7.36)        | 0 (0-7.32)          | 0 (0-7.20)       | 0 (0-17.48)         | 0 (0-17.48)        | 0 (0-20.72)         |
| 12-23              | 0 (0-21.2)          | 0 (0-7.87)         | 0 (0-7.56)       | 0 (0-7.48)        | 0 (0-7.44)          | 0 (0-7.32)       | 0 (0-17.82)         | 0 (0-17.73)        | 11.43 (1.38-41.28)  |
| 24-59              | 0 (0-9.94)          | 2.07 (0.43-6.05)   | 2.53 (0.31-9.16) | 0(0-4.55)         | 0 (0-4.36)          | 0 (0-4.39)       | 2.80 (0.07-15.61)   | 0 (0-10.79)        | 18.94 (6.44.20)     |
| <b>Region 3</b>    |                     |                    |                  |                   |                     |                  |                     |                    |                     |
| AdjR (95% CI)      | 0.85 (0.46-1.25)    | *                  | 3.08 (2.26-3.89) | 2.03 (1.38-2.69)  | *                   | *                | *                   | *                  | 2.66 (1.84-3.48)    |
| 0-11               | 0.22 (0.01- 1.24)   | 0 (0-0.85)         | 0.68 (0.14-2.00) | 4.32 (2.60-6.74)  | 1.61 (0.65- 3.32)   | 0.46 (0.06-1.67) | 0.71 (0.15-2.08)    | 0 (0-1.87)         | 1.68 (0.68-3.47)    |
| 12-23              | 0.18 (0.38-2.75)    | 0.70 (0.14-2.04)   | 1.16 (0.38-2.70) | 1.38 (0.51-3.01)  | 0.47 (0.06-1.69)    | 0.23 (0.01-0.30) | 0.48 (0.06-1.74)    | 0.70 (0.15-2.10)   | 2.69 (1.34-4.81)    |
| 24_59              | 0.99 (0.51-1.74)    | 1.12 (0.62-1.89)   | 5.01 (3.67-6.68) | 1.29 (0.67-2.25)  | 0.94 (0.43-1.78)    | 0.84 (0.36-1.66) | 0.95 (0.41-1.88)    | 0.37 (0.08-1.07)   | 3.09 (1.96-4.64)    |
| <b>Region 4</b>    |                     |                    |                  |                   |                     |                  |                     |                    |                     |
| AdjR (95% CI)      | 0.71 (0.60-0.82)    | 0.78 (0.66-0.89)   | 1.60 (1.43-1.78) | 0.86 (0.73-0.99)  | 1.03 (0.89-1.17)    | 0.99 (0.85-1.13) | 1.97 (1.76-2.17)    | 1.20 (1.05-1.36)   | 4.27 (3.95-4.60)    |
| 0-11               | 0.87 (0.62-1.18)    | 0.58 (0.38-0.85)   | 0.65 (0.44-0.94) | 0.72 (0.49-1.01)  | 1.34 (0.84-1.50)    | 1.07 (0.78-1.42) | 1.97 (1.57-2.44)    | 1.41 (1.08-1.81)   | 5.36 (4.71-6.08)    |
| 12-23              | 0.98 (0.71-1.33)    | 1.38 (1.06-1.77)   | 1.88 (1.50-2.34) | 1.53 (1.18-1.94)  | 1.24 (0.93-1.62)    | 1.64 (1.28-2.07) | 2.23 (1.79-2.74)    | 1.62 (1.26-2.05)   | 7.79 (6.75-8.93)    |
| 24-59              | 0.54 (0.42-0.69)    | 0.63 (0.51-0.77)   | 1.86 (1.62-2.13) | 0.66 (0.52-0.83)  | 0.90 (0.74-1.09)    | 0.72 (0.57-0.89) | 1.87 (1.61-2.15)    | 0.71 (0.79-1.19)   | 2.55 (2.24-2.88)    |
| <b>Region 5</b>    |                     |                    |                  |                   |                     |                  |                     |                    |                     |
| AdjR (95% CI)      | 0.21 (0.13-0.29)    | 0.80 (0.65-0.96)   | 0.30 (0.21-0.40) | 1.38 (1.18-1.59)  | 0.32 (0.22-0.41)    | 2.57(2.29-2.85)  | 4.74 (4.33-5.14)    | 1.20 (0.98-1.42)   | 0.93 (0.72-1.13)    |
| 0-11               | 0.19 (0.06-0.44)    | 0.58 (0.32-0.97)   | 0.29 (0.12-0.59) | 1.10 (0.72-1.60)  | 0.08 (0.01-0.30)    | 4.60 (3.79-5.53) | 1.79 (1.28-2.43)    | 0.46 (0.21-0.88)   | 0.53 (0.26-0.94)    |
| 12-23              | 0.48 (0.25-0.84)    | 0.59 (0.32-0.98)   | 0.37 (0.17-0.71) | 2.19 (1.64-2.86)  | 0.63 (0.35-1.03)    | 4.63 (3.81-5.57) | 2.48 (1.88-3.22)    | 1.78 (1.23-2.48)   | 2.40 (1.66-3.36)    |
| 24-59              | 0,14 (0.07-0.25)    | 0.94 (0.74-1.17)   | 0.29 (0.18-0.44) | 1.23 (0.99-1.50)  | 0.29 (0.19-0.44)    | 1.32 (1.07-1.60) | 6.35 (5.76-6.97)    | 1.25 (0.98-1.58)   | 0.60 (0.41-0.83)    |
| <b>Region 6</b>    |                     |                    |                  |                   |                     |                  |                     |                    |                     |
| AdjR (95% CI)      | 7.23 (6.70-7.76)    | 6.20 (5.72-6.68)   | 2.96 (2.63-3.30) | 2.95 (2.62-3.29)  | 7.34 (6.81-7.87)    | 2.39 (2.09-2.69) | 8.54 (7.95-9.14)    | 6.14 (5.63-6.63)   | 24.67 (23.61-25.73) |
| 0-11               | 7.89 (6.70-9.23)    | 8.99 (7.73-10.43)  | 3.06 (2.33-3.95) | 5.29 (4.32-6.43)  | 13.80 (12.18-15.58) | 3.41 (2.62-4.35) | 10.70 (9.24-12.32)  | 9.21 (7.86-10.72)  | 2.86 (2.14-3.75)    |
| 12-23              | 13.70 (12.07-15.49) | 10.91 (9.48-12.51) | 5.38 (4.38-6.53) | 4.64 (3.72-5.71)  | 14.44 (12.77-16.28) | 4.16 (3.28-5.20) | 16.10 (14.29-18.08) | 10.25 (8.82-11.86) | 6.68 (5.41-8.15)    |
| 24-59              | 5.11 (4.54-5.73)    | 3.95 (3.48-4.47)   | 2.21 (1.86-2.62) | 1.74 (1.43-2.11)  | 3.27 (2.84-3.75)    | 1.56 (1.26-1.90) | 5.64 (5.03-6.31)    | 3.98 (3.48-4.53)   | 36.61 (34.97-38.31) |
| <b>Region 7</b>    |                     |                    |                  |                   |                     |                  |                     |                    |                     |
| AdjR (95% CI)      | 0.89 (0.76-1.02)    | 1.18 (1.04-1.32)   | 0.86 (0.74-0.99) | 1.44 (1.28-1.60)  | 1.60 (1.43-1.76)    | 0.98 (0.85-1.12) | 1.34 (1.18-1.51)    | 1.39 (1.23-1.56)   | 4.79 (4.49-5.10)    |
| 0-11               | 0.80 (0.56-1.09)    | 1.69 (1.33-2.10)   | 1.05 (0.78-1.39) | 2.07 (1.68-2.53)  | 1.73 (1.37-2.15)    | 1.45 (0.86-1.50) | 1.56 (0.86-1.52)    | 1.37 (1.04-1.76)   | 6.69 (5.96-7.48)    |
| 12-23              | 0.97 (0.70-1.31)    | 1.60 (1.26-2.01)   | 1.11 (0.83-1.46) | 1.84 (1.47-2.28)  | 2.22 (1.81-2.70)    | 1.71 (1.36-2.14) | 1.99 (1.59-2.47)    | 2.68 (2.21-3.22)   | 7.54 (6.76-8.39)    |
| 24-59              | 0.89 (0.73-1.09)    | 0.84 (0.70-0.99)   | 0.70 (0.56-0.87) | 1.06 (0.88-1.26)  | 1.32 (1.12-1.54)    | 0.66 (0.52-0.82) | 1.17 (0.98-1.40)    | 0.93 (0.75-1.14)   | 3.08 (2.75-3.44)    |
| <b>Region 8</b>    |                     |                    |                  |                   |                     |                  |                     |                    |                     |
| AdjR (95% CI)      | 0.38 (6.23-0.52)    | 1.07(0.84-1.31)    | 0.87 (0.65-1.10) | 3.98 (3.51-4 .45) | 1.03 (0.79-1.27)    | 1.77 (1.44-2.09) | 0.69 (0.48-0.90)    | 0.72 (0.50-0.94)   | 1.75 (1.42-2.07)    |
| 0-11               | 0.26 (0.07-0.66)    | 1.45 (0.90-2.22)   | 0.28 (0.08-0.72) | 6.66 (5.38-8.15)  | 0.44 (0.16-0.95)    | 1.12 (0.62-1.84) | 0.40 (0.13-0.93)    | 0.64 (0.28-1.27)   | 2.24 (1.52-3.19)    |
| 12-23              | 0.21 (0.04-0.61)    | 1.69 (1.08-2.51)   | 1.42 (0.87-2.20) | 6.05 (4.82-7.49)  | 1.63 (1.02-2.47)    | 2.34 (1.59-3.32) | 0.89 (0.44-1.59)    | 0.98 (0.51-1.71)   | 3.23 (2.35-4.34)    |
| 24-59              | 0.48 (0.28-0.74)    | 0.74 (0.51-1.03)   | 0.89 (0.62-1.24) | 2.36 (1.91-2.89)  | 1.03 (0.74-1.39)    | 1.80 (1.40-2.27) | 0.72 (0.46-1.06)    | 0.66 (0.41-0.99)   | 1.07 (0.76-1.48)    |

AdjR = Age-adjusted prevalence rate of consultations for asthma, expressed per 1000 childhood population ; 95%CI= confidence interval at 95%.

\* Directly standardized rates method is unreliable with small number (number of total observed events should be >= 25)

**Additional File 2 : Continued**

| Age group        | 2004              | 2005              | 2006             | 2007             | 2008              | 2009              | 2010              | 2011              | 2012             |
|------------------|-------------------|-------------------|------------------|------------------|-------------------|-------------------|-------------------|-------------------|------------------|
| <i>Region 9</i>  |                   |                   |                  |                  |                   |                   |                   |                   |                  |
| AdjR (95% CI)    | 2.72 (1.74-3.70)  | *                 | 1.92 (1.49-2.34) | 0.87 (0.59-1.15) | 1.03 (0.73-1.32)  | 1.16 (0.85-1.47)  | *                 | *                 | *                |
| 0-11             | 4.69 (2.94-7.10)  | 0.89 (0.29-2.07)  | 1.02 (0.37-2.21) | 0.97 (0.36-2.11) | 0.47 (0.10-1.37)  | 0.15 (0.004-0.83) | 0 (0-0.77)        | 0.61 (5.00-6.25)  | 0 (0-0.73)       |
| 12-23            | 3.12 (1.71-5.24)  | 0.72 (0.20-1.85)  | 1.89 (0.94-3.39) | 1.31 (0.57-2.58) | 1.47 (0.87-3.12)  | 0.91 (0.34-1.97)  | 0 (0-0.79)        | 0 (0-0.77)        | 0.40 (0.05-1.44) |
| 24-59            | 2.25 (1.16-3.93)  | 0.59 (0.30-1.06)  | 2.10 (1.60-2.70) | 0.76 (0.48-1.15) | 1.00 (0.68-1.41)  | 1.42 (1.04-1.89)  | 0.27 (0.10-0.58)  | 0.05 (0.001-0.25) | 0.55 (0.29-0.96) |
| <i>Region 10</i> |                   |                   |                  |                  |                   |                   |                   |                   |                  |
| AdjR (95% CI)    | 3.05 (2.53-3.57)  | 1.58 (1.24-1.92)  | 1.27 (0.95-1.60) | 1.11 (0.81-1.42) | 3.08 (2.58-3.59)  | 1.75 (1.36-2.13)  | 1.59 (1.19-1.97)  | *                 | 1.38 (1.01-1.76) |
| 0-11             | 0.99 (0.45-1.87)  | 1.23 (0.63-2.14)  | 0.71 (0.29-1.46) | 0.50 (0.16-1.18) | 5.41 (4.05-7.08)  | 1.94 (1.17-3.03)  | 1.69 (0.95-2.79)  | 0.11 (0.003-0.64) | 0.57 (0.18-1.33) |
| 12-23            | 1.72 (0.94-2.89)  | 1.77 (1.03-2.83)  | 2.16 (1.34-3.31) | 2.05 (1.25-3.16) | 4.15 (2.96-5.64)  | 3.94 (2.79-5.40)  | 1.72 (0.96-2.83)  | 0.35 (0.07-1.02)  | 2.42 (1.50-3.70) |
| 24-59            | 4.29 (3.52-5.18)  | 1.64 (1.23-2.15)  | 1.16 (0.78-1.65) | 1.00 (0.65-1.46) | 1.84 (1.36-2.43)  | 0.88 (0.56-1.32)  | 1.49 (1.03-2.08)  | 0.64 (0.35-1.07)  | 1.31 (0.86-1.90) |
| <i>Region 11</i> |                   |                   |                  |                  |                   |                   |                   |                   |                  |
| AdjR (95% CI)    | 2.92 (2.63-3.21)  | 1.23 (1.05-1.41)  | 0.89 (0.74-1.04) | 2.04 (1.81-2.27) | 0.48 (0.36-0.58)  | 1.53 (1.33-1.73)  | 2.22 (1.97-2.47)  | 2.30 (2.05-2.57)  | 2.00 (1.75-2.24) |
| 0-11             | 2.04 (1.55-2.63)  | 0.54 (0.30-0.89)  | 0.93 (0.61-1.36) | 2.80 (2.21-3.49) | 0.04 (0.001-0.20) | 1.29 (0.901-1.78) | 2.90 (2.28-3.63)  | 3.43 (2.75-4.21)  | 1.99 (1.49-2.59) |
| 12-23            | 4.24 (3.46-5.15)  | 1.31 (0.92-1.82)  | 1.67 (1.22-2.22) | 3.13 (2.50-3.86) | 0.90 (0.58-1.32)  | 2.76 (2.17-3.45)  | 3.60 (2.91-4.41)  | 3.48 (2.80-4.28)  | 2.24 (1.71-2.88) |
| 24-59            | 2.79 (2.44-3.18)  | 1.40 (1.17-1.67)  | 0.64 (0.49-0.83) | 1.50 (1.26-1.77) | 0.47 (0.34-0.63)  | 1.36 (1.01-1.48)  | 1.61 (1.34-1.91)  | 1.63 (1.36-1.94)  | 1.93 (1.63-2.26) |
| <i>Region 12</i> |                   |                   |                  |                  |                   |                   |                   |                   |                  |
| AdjR (95% CI)    | 1.08 (0.87-1.28)  | 0.58 (0.44-0.72)  | 0.89 (0.70-1.07) | 1.97 (1.69-2.24) | 1.54 (1.30-1.78)  | 1.17 (0.96-1.38)  | 3.25 (2.88-3.62)  | 0.67 (0.50-0.84)  | 1.66 (1.40-1.93) |
| 0-11             | 0.20 (0.05-0.51)  | 0.05 (0.001-0.27) | 0.38 (0.16-0.75) | 0.33 (0.13-0.68) | 1.34 (0.89-1.94)  | 0.58 (0.30-1.00)  | 2.69 (2.02-3.52)  | 0.56 (0.28-1.01)  | 0.87 (0.52-1.38) |
| 12-23            | 0.76 (0.42-1.28)  | 1.93 (1.38-2.63)  | 0.91 (0.55-1.43) | 4.12 (3.30-5.09) | 3.31 (2.57-4.19)  | 1.80 (1.27-2.49)  | 4.90 (3.96-5.99)  | 0.73 (0.40-1.22)  | 2.85 (2.16-3.68) |
| 24-59            | 1.49 (1.20-1.84)  | 0.30 (0.19-0.46)  | 1.06 (0.81-1.35) | 1.80 (1.47-2.18) | 1.00 (0.76-1.29)  | 1.16 (0.90-1.47)  | 2.87 (2.43-3.37)  | 0.69 (0.48-0.96)  | 1.53 (1.21-1.92) |
| <i>Region 13</i> |                   |                   |                  |                  |                   |                   |                   |                   |                  |
| AdjR (95% CI)    | 1.00 (0.80-1.20)  | 1.57 (1.32-1.81)  | 2.13 (1.84-2.43) | 0.79 (0.61-0.97) | 0.67 (0.50-0.83)  | 1.14 (0.92-1.35)  | 2.31 (1.98-2.63)  | 1.20 (0.95-1.45)  | 1.39 (1.13-1.67) |
| 0-11             | 2.08 (1.53-2.76)  | 3.25 (2.54-4.09)  | 2.93 (2.26-3.73) | 1.17 (0.77-1.72) | 0.92 (0.56-1.42)  | 0.79 (0.46-1.26)  | 2.47 (1.83-3.25)  | 0.79 (0.44-1.31)  | 1.00 (0.61-1.54) |
| 12-23            | 1.05 (0.66-1.57)  | 2.61 (1.98-3.38)  | 1.05 (0.67-1.58) | 0.41 (0.19-0.78) | 0.51 (0.26-0.92)  | 1.37 (0.92-1.96)  | 2.91 (2.21-3.76)  | 1.34 (0.87-1.98)  | 1.83 (1.28-2.53) |
| 24-59            | 0.52 (0.35-0.75)  | 0.43 (0.29-0.61)  | 2.25 (1.85-2.70) | 0.79 (0.56-1.08) | 0.62 (0.43-0.88)  | 1.18 (0.90-1.53)  | 1.99 (1.59-2.45)  | 1.31 (0.97-1.73)  | 1.38 (1.02-1.81) |
| <i>Region 14</i> |                   |                   |                  |                  |                   |                   |                   |                   |                  |
| AdjR (95% CI)    | 0.15 (0.03-0.27)  | *                 | 0.29 (0.14-0.45) | 0.83 (0.57-1.09) | 0.27 (0.12-0.42)  | 1.82 (1.44-2.20)  | 0.53 (0.31-0.75)  | 2.42 (1.95-2.88)  | 3.81 (3.22-4.41) |
| 0-11             | 0.11 (0.003-0.62) | 0.84 (0.36-1.66)  | 0.42 (0.11-1.07) | 0 (0-0.38)       | 0.31 (0.06-0.92)  | 0.86 (2.72-5.32)  | 0.55 (1.18-1.29)  | 2.21 (1.35-3.41)  | 0.51(0.24-0.93)  |
| 12-23            | 0 (0-0.45)        | 0 (0-0.39)        | 0.53 (0.17-1.23) | 0.21 (0.03-0.76) | 0.42 (0.12-1.09)  | 1.17 (0.58-2.09)  | 0.34 (0.07-0.99)  | 1.57 (0.86-2.63)  | 1.51 (0.83-2.53) |
| 24-59            | 0.21 (0.07-0.49)  | 0.15 (0.04-0.37)  | 0.18 (0.06-0.41) | 1.30 (0.91-1.79) | 0.21 (0.08-0.45)  | 1.36 (0.978-1.86) | 0.59 (0.33-0.97)  | 2.76 (2.14-3.49)  | 5.65 (4.74-6.67) |
| <i>Region 15</i> |                   |                   |                  |                  |                   |                   |                   |                   |                  |
| AdjR (95% CI)    | 2.15 (1.93-2.38)  | 1.61 (1.41-1.81)  | 1.01 (0.85-1.17) | 1.05 (0.88-1.21) | 1.16 (0.98-1.33)  | 2.63 (2.36-2.89)  | 1.13 (0.95-1.30)  | 3.08 (2.79-3.37)  | 1.52 (1.32-1.72) |
| 0-11             | 0.86 (0.58-1.24)  | 1.23 (0.86-1.69)  | 1.92 (1.46-2.48) | 1.44 (1.03-1.95) | 2.18 (1.67-2.80)  | 4.57 (3.81-5.43)  | 1.41 (1.00-1.92)  | 2.56 (2.00-3.23)  | 2.19 (1.68-2.80) |
| 12-23            | 2.42 (1.90-3.04)  | 3.10 (2.50-3.80)  | 0.94 (0.63-1.36) | 0.93 (0.60-1.36) | 0.62 (0.36-0.99)  | 3.76 (3.07-4.56)  | 1.68 (1.23-2.25)  | 5.79 (4.92-6.77)  | 3.21 (2.58-3.94) |
| 24-59            | 2.46 (2.16-2.80)  | 1.28 (1.07-1.53)  | 0.76 (0.59-0.96) | 0.97 (0.78-1.19) | 1.01 (0.82-1.24)  | 1.71 (1.45-2.00)  | 0.88 (0.69-1.10)  | 2.44 (2.11-2.80)  | 0.82 (0.63-1.04) |
| <i>Region 16</i> |                   |                   |                  |                  |                   |                   |                   |                   |                  |
| AdjR (95% CI)    | 0.11 (0.09-0.13)  | 1.58 (1.37-1.79)  | 1.81 (1.58-2.04) | 3.34 (3.03-3.65) | 2.98 (2.68-3.27)  | 2.59 (2.32-2.87)  | 4.30 (3.931-4.67) | 2.75(2.47-3.03)   | 3.55 (3.25-3.86) |
| 0-11             | 0.21 (0.16-0.26)  | 2.68 (2.09-3.38)  | 2.60 (2.03-3.29) | 4.95 (4.15-5.26) | 4.35 (3.60-5.21)  | 4.10 (3.38-4.93)  | 5.09 (4.26-6.04)  | 4.92 (4.14-5.80)  | 4.48 (3.73-5.33) |
| 12-23            | 0.14 (0.10-0.18)  | 2.38 (1.82-3.05)  | 2.98 (2.36-3.72) | 4.40 (3.64-5.26) | 4.42 (3.66-5.28)  | 4.13 (3.39-4.97)  | 6.79 (5.81-7.88)  | 3.94 (3.24-4.74)  | 6.03 (5.15-7.01) |
| 24-59            | 0.07 (0.05-0.09)  | 0.93 (0.75-1.15)  | 1.13 (0.90-1.40) | 2.42 (2.08-2.79) | 2.00 (1.70-2.34)  | 1.54 (1.28-1.84)  | 3.17 (2.76-3.62)  | 1.58 (1.31-1.89)  | 2.37 (2.08-2.70) |

AdjR = Age-adjusted prevalence rate of consultations for asthma, expressed per 1000 childhood population ; 95%CI= confidence interval at 95%.

\* Directly standardized rates method is unreliable with small number (number of total observed events should be >= 25)
